# Supplementary material
Source: PubMed Central journal article supplement (PMC3003305)

a

***Kras*<sup>LA2</sup>**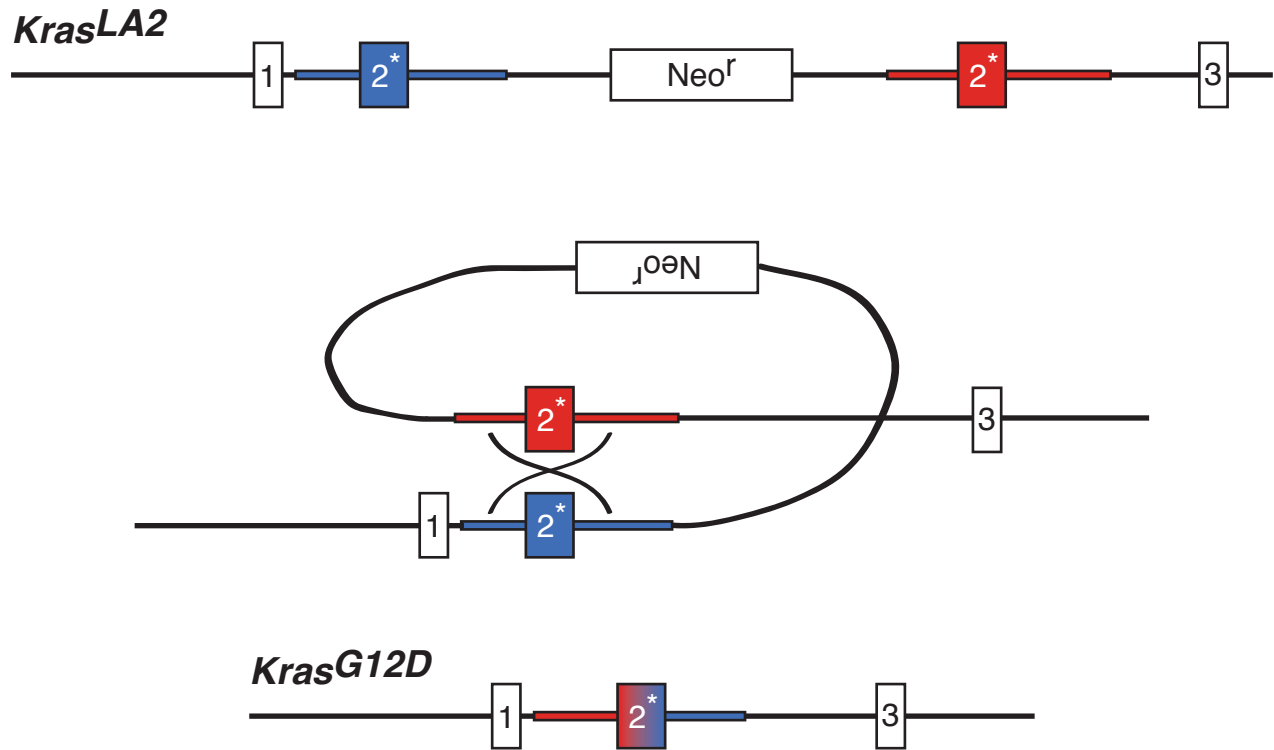

b

***Trp53*<sup>LSL</sup>**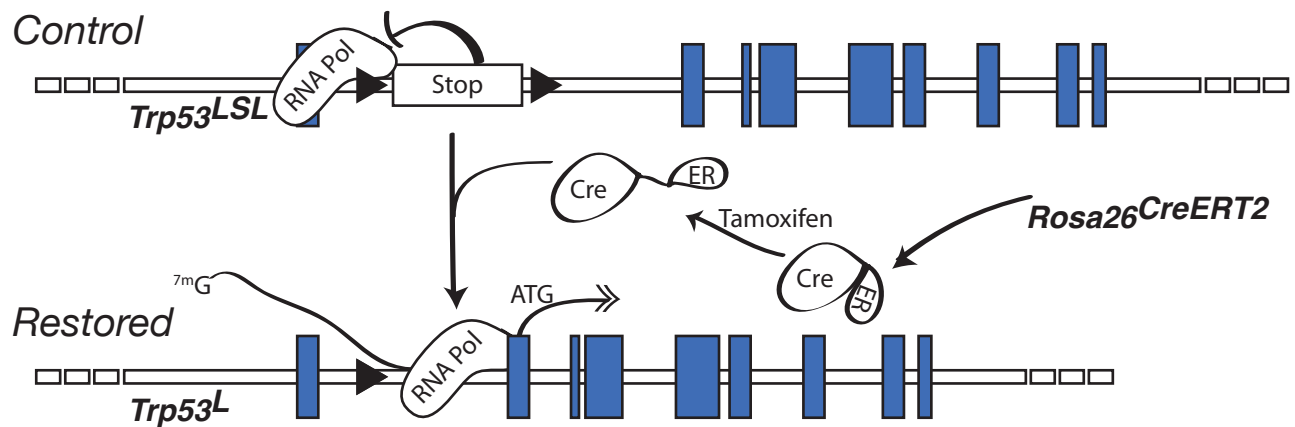

**a**

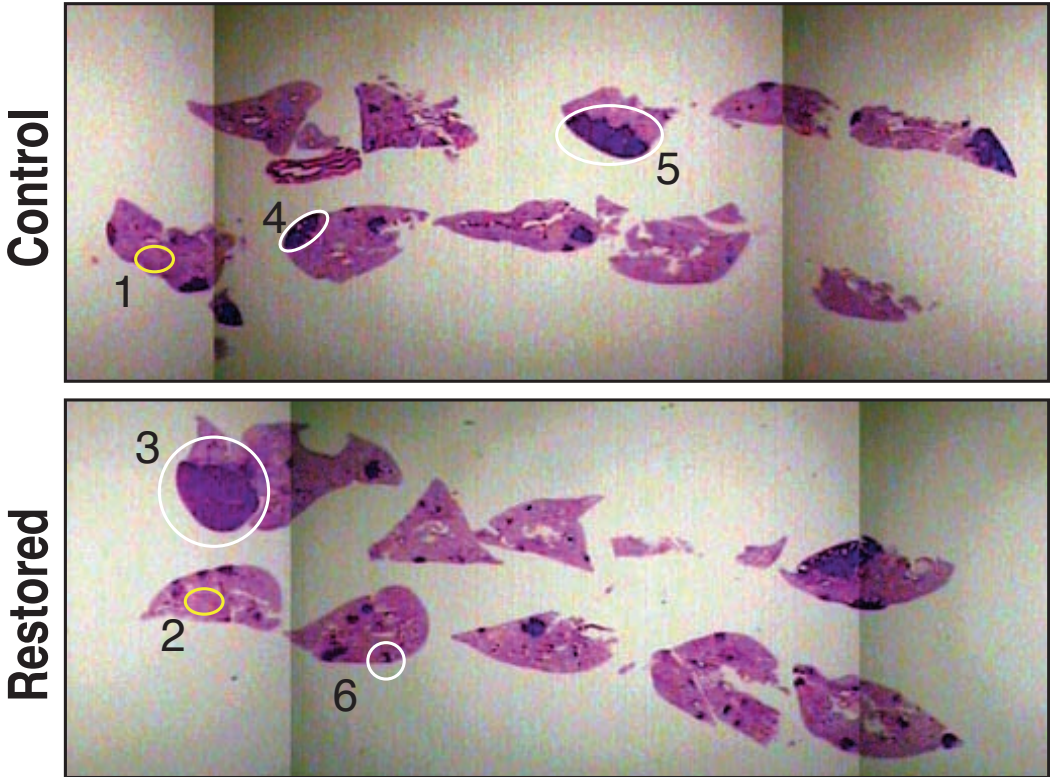

**b**

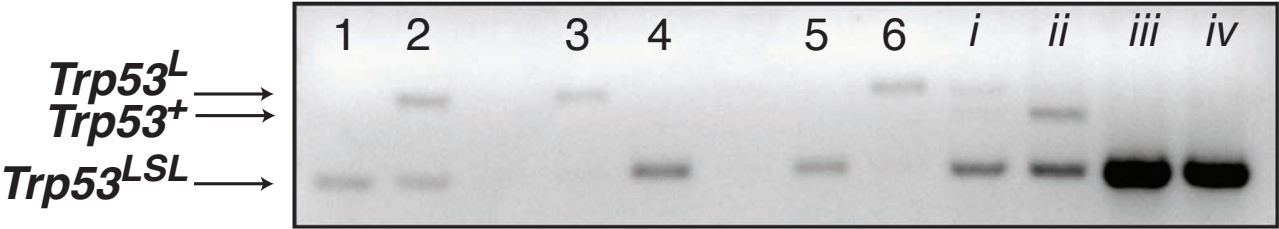

**a**

*Kras*<sup>LA2/+</sup>; *Trp53*<sup>+/+</sup>

*Kras*<sup>LA2/+</sup>; *Trp53*<sup>LSL/LSL</sup>

4 Week

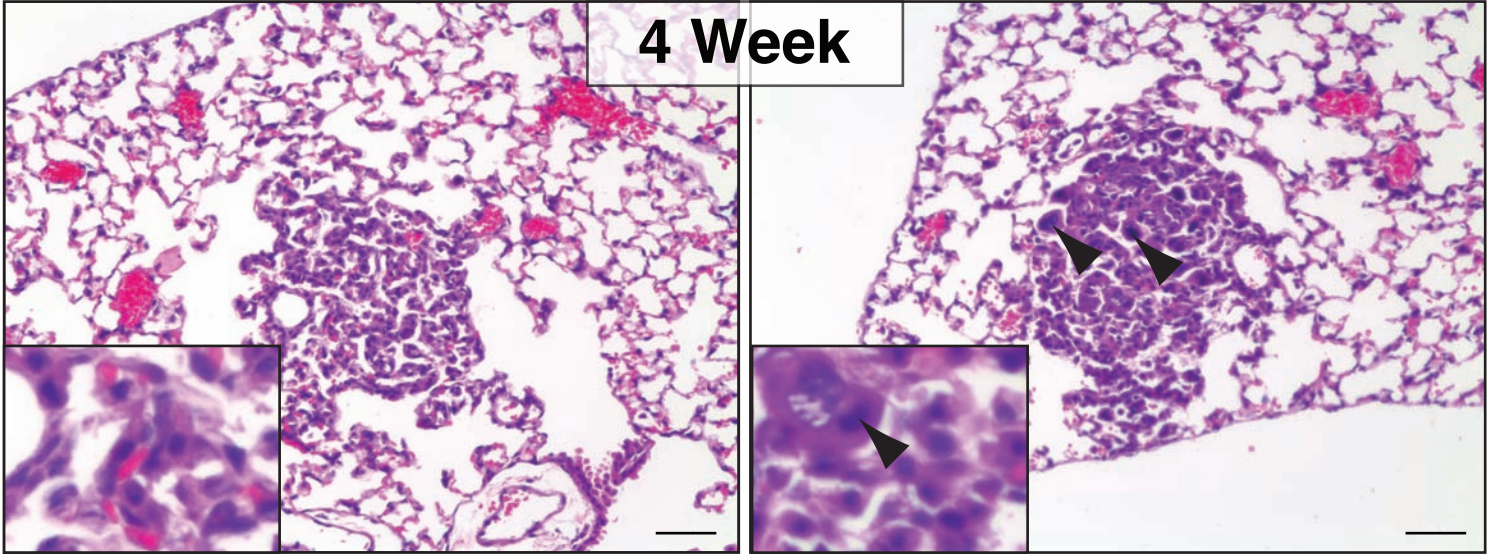

**b**

*Kras*<sup>LA2/+</sup>; *Trp53*<sup>+/+</sup>

*Kras*<sup>LA2/+</sup>; *Trp53*<sup>LSL/LSL</sup>

10 Week

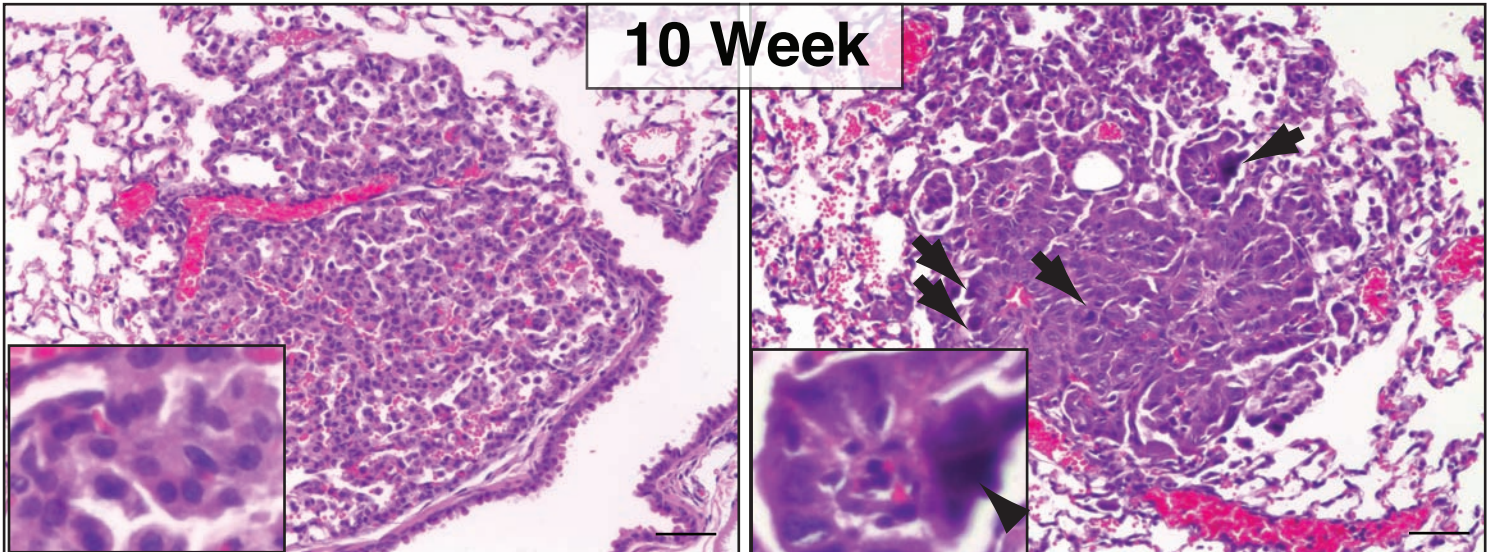

Supplementary Fig. 4

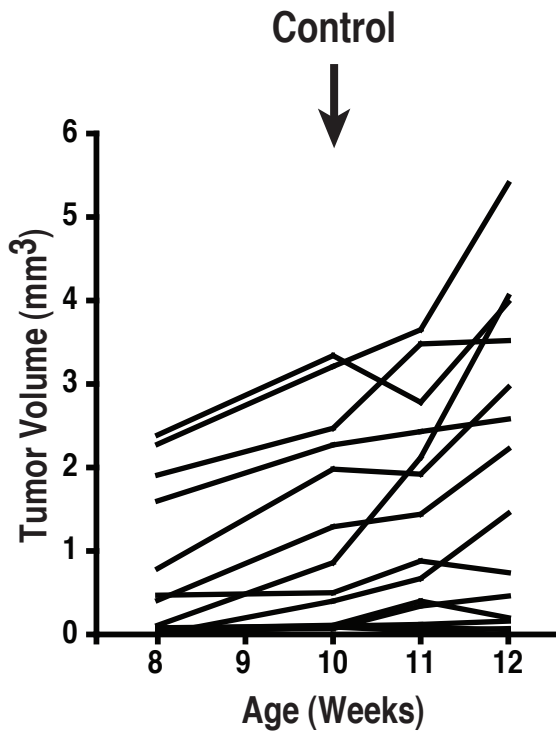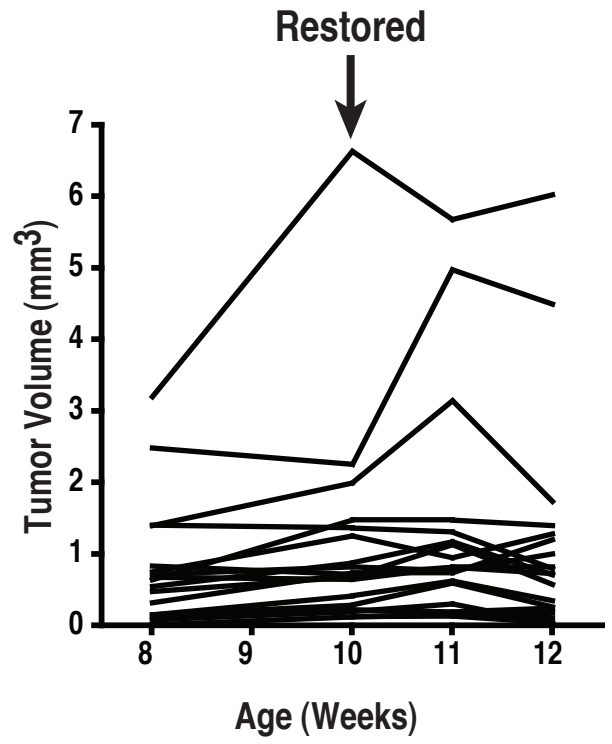



# Supplementary Fig. 5

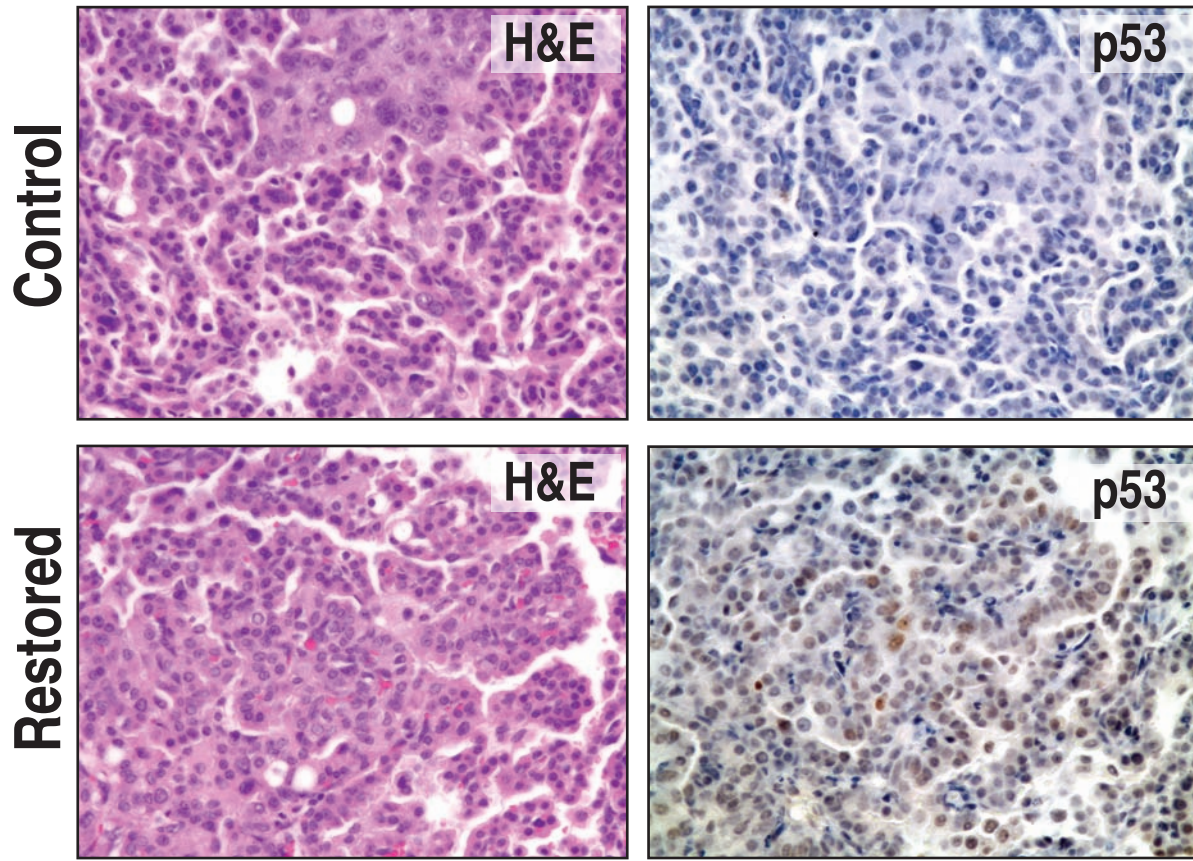

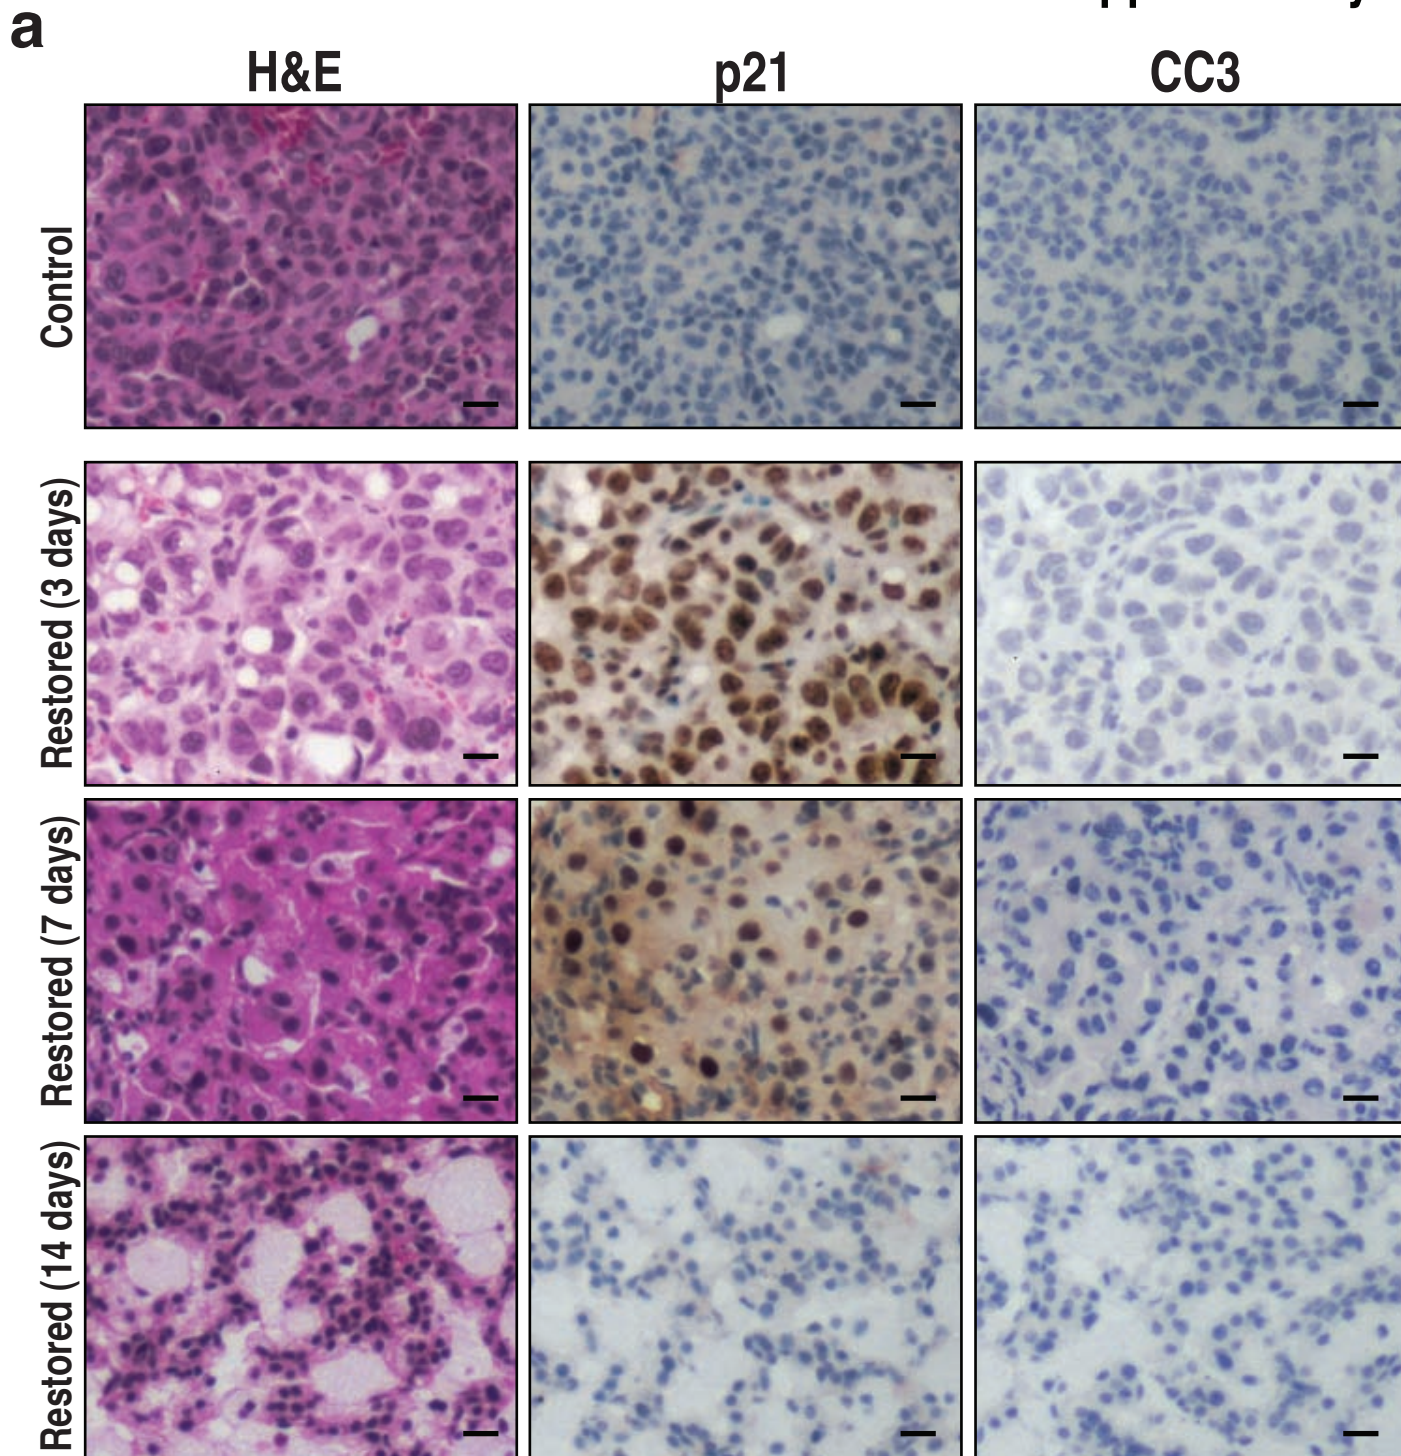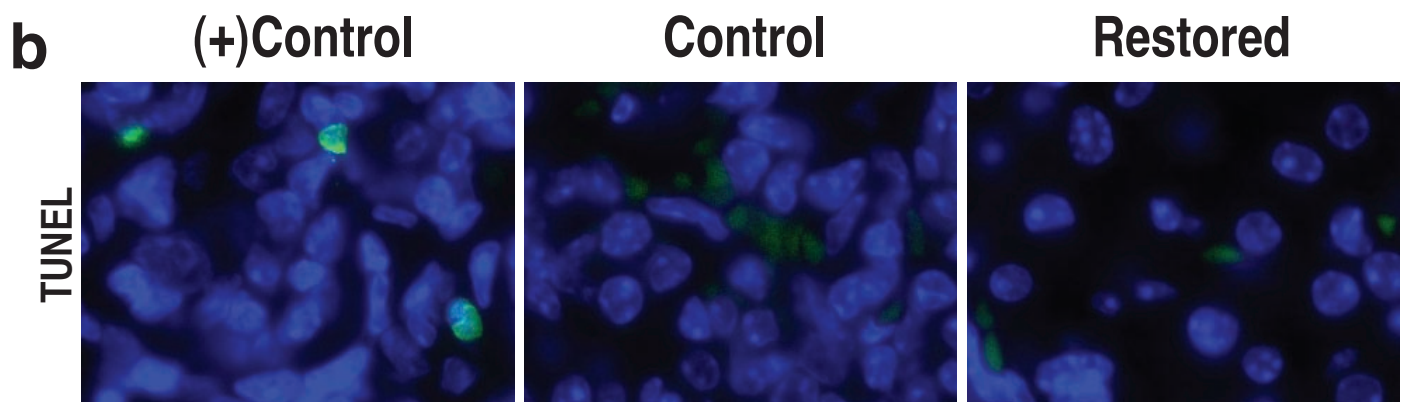



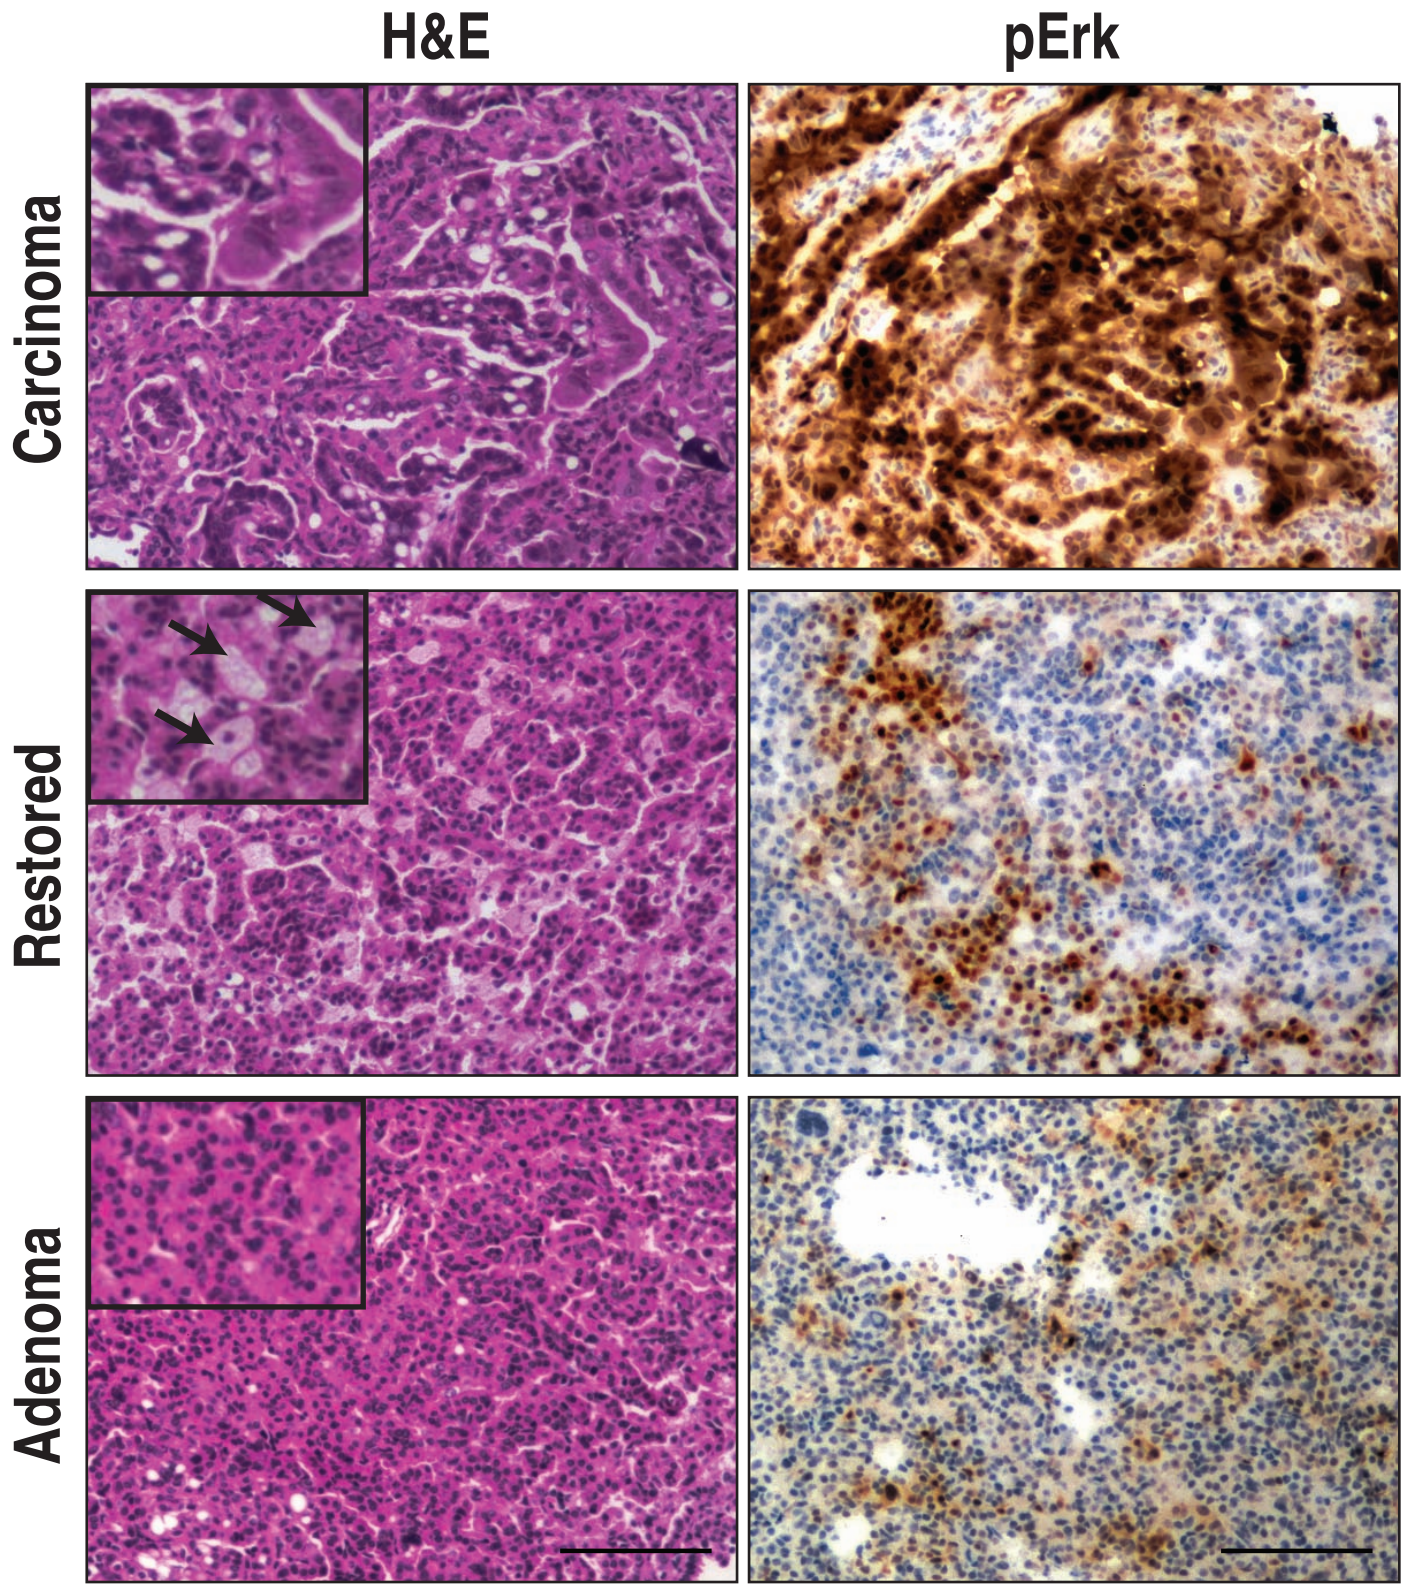



# Supplementary Fig. 8

**a**

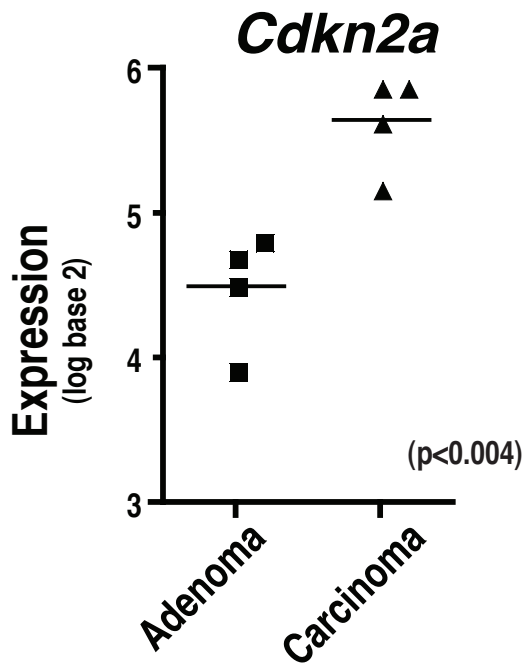

**b**

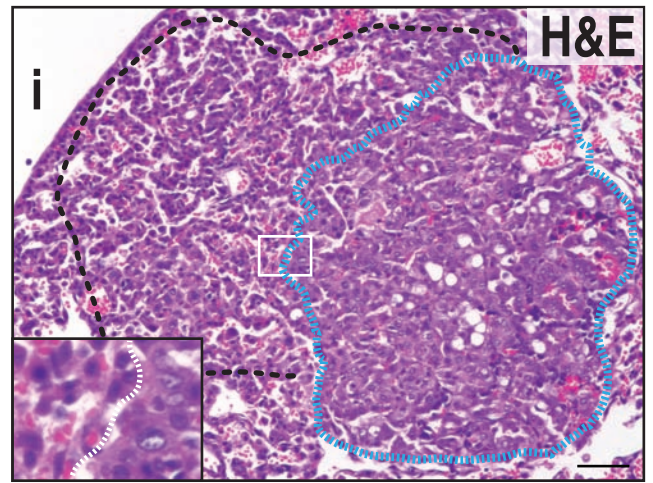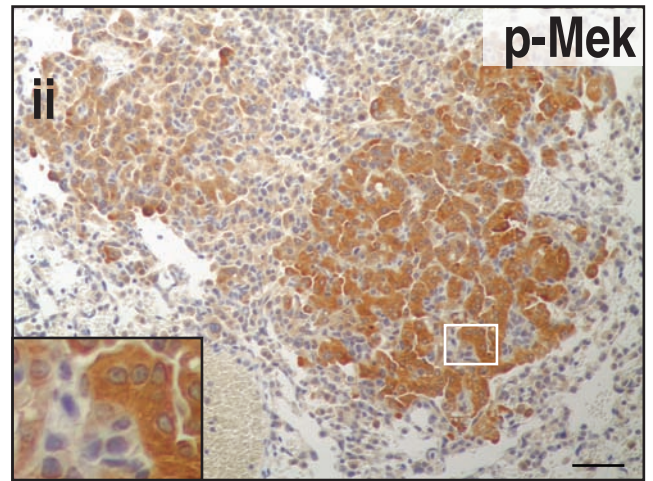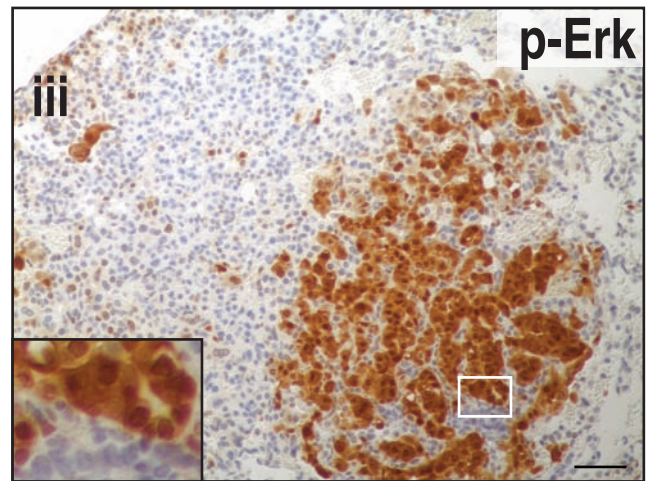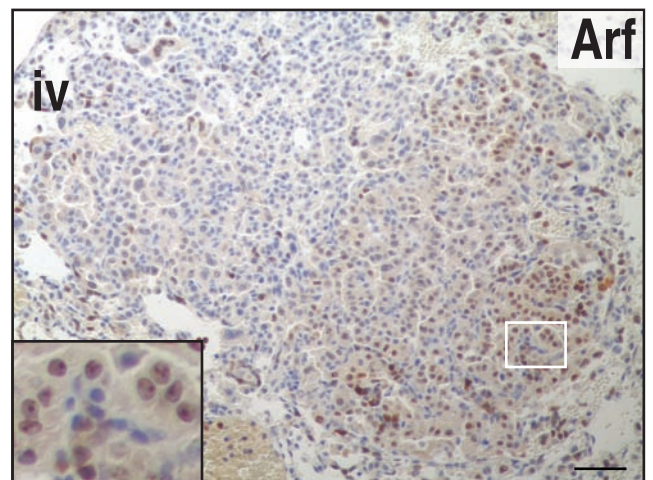

**c**

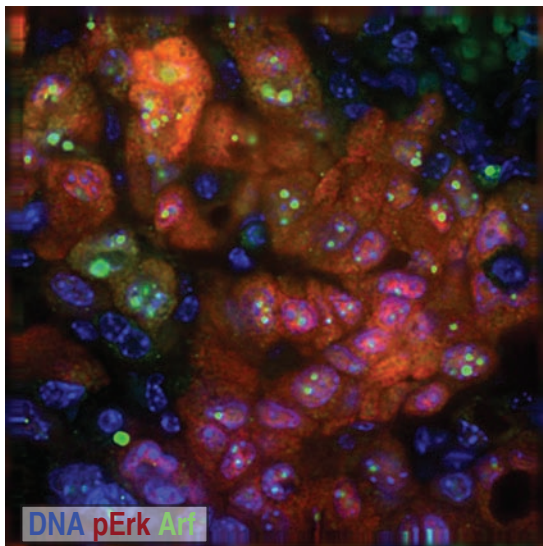



# Supplementary Fig. 9

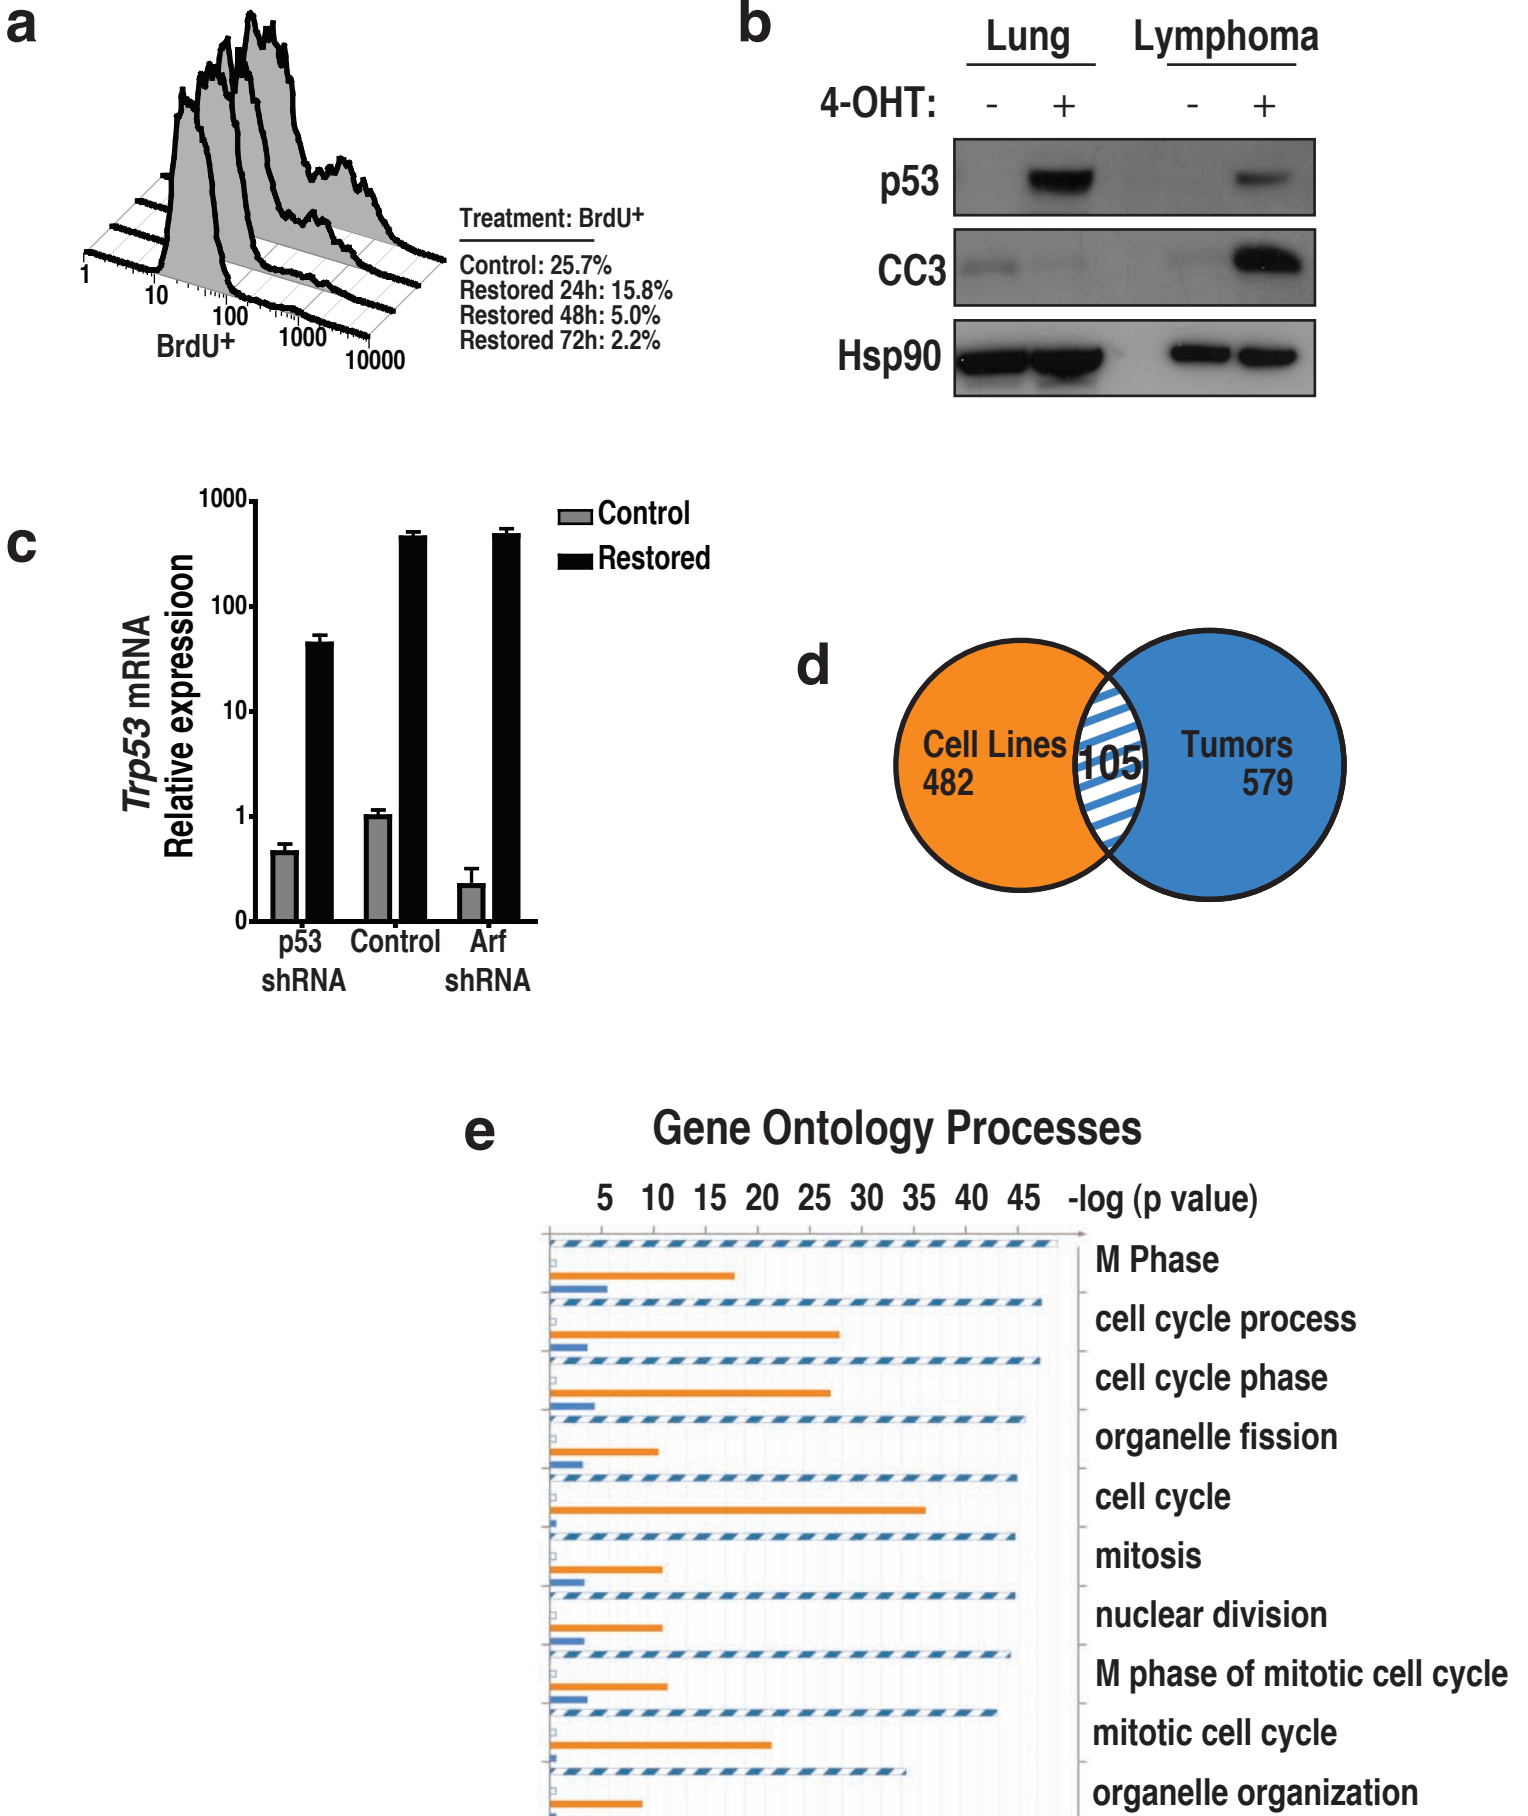

Supplement: NIHMS240527-supplement-1.pdf [file NIHMS240527-supplement-1.pdf]
